# Supplementary material for: Pyridyl substitution at the 2,6-positions of anthracene toward crystal polymorphs with distinct optical characteristics
Source: Royal Society of Chemistry journal article supplement (doi:10.1039/d2ce00899h), 2022-01-01
Supplement: d2ce00899h1.pdf [file d2ce00899h1.pdf]

## Pyridyl substitution at 2,6-positions of anthracene toward crystal polymorphs with distinct optical characteristics

Geetha Bolla,<sup>a#</sup> Junfeng Guo,<sup>abc#</sup> Huijuan Zhao,<sup>d#</sup> Shaokai Lv,<sup>e</sup> Jie Liu,<sup>a</sup> Yang Li,<sup>f</sup> Yonggang Zhen<sup>\*bg</sup>, Qing Liao,<sup>e</sup> Xinran Wang,<sup>h</sup> Hongbing Fu,<sup>e</sup> Huanli Dong,<sup>a</sup> Zongrui Wang,<sup>b</sup> Zhaohui Wang,<sup>i</sup> Wenping Hu<sup>\*k</sup>

- a. National Laboratory for Molecular Sciences, Key Laboratory of Organic Solids, Institute of Chemistry, Chinese Academy of Sciences, Beijing 100190 (China).
- b. Beijing Advanced Innovation Center for Soft Matter Science and Engineering & State Key Laboratory of Organic–Inorganic Composites, Beijing University of Chemical Technology, Beijing 100029, China.
- c. University of the Chinese Academy of Sciences, Beijing 100039, China.
- d. State Key Laboratory for Organic Electronics and Information Displays (KLOEID), Institute of Advanced Materials (IAM), School of Materials Science and Engineering, Nanjing University of Posts and Telecommunications
- e. Beijing Key Laboratory for Optical Materials and Photonic Devices, Department of Chemistry, Capital Normal University, Beijing 100048, China.
- f. Normal College, Shenyang University, Shenyang 110044, China
- g. State Key Laboratory of Optoelectronic Materials and Technologies, Sun Yat-sen University, Guangdong 510275, China
- h. National Laboratory of Solid State Microstructures, School of Electronic Science and Engineering, and Collaborative Innovation Center of Advanced Microstructures, Nanjing University, Nanjing 210093, China.
- i. Key Laboratory of Organic Optoelectronics and Molecular Engineering, Department of Chemistry, Tsinghua University, Beijing 100084, China.
- j. Tianjin Key Laboratory of Molecular Optoelectronic Science, Department of Chemistry, School of Science, Tianjin University, Tianjin 300072, China.

# These authors contributed equally to this work.

\*Correspondence: zhenyg@buct.edu.cn; huwp@tju.edu.cn.

### Experimental section

**Materials and Chemicals:** 2,6-Di(pyridin-4-yl)anthracene was synthesized by a Suzuki coupling reaction.<sup>1</sup> Acetonitrile (CH<sub>3</sub>CN, HPLC) were purchased from Beijing Chemical Co., China. Deionized water (18.2 MΩ·cm<sup>-1</sup>) was made by using a Milli-Q (Millipore) water purification system.

**Preparation of two phases of crystals:** Two phases of crystals were prepared by solution drop-casting. In a typical experiment, DPYA was dissolved in acetonitrile solution. The DPYA solution was then directly dropped onto the substrate (quartz, glass or SiO<sub>2</sub>/Si wafer), and two phases of crystals were observed after the solvent evaporated completely.

**Single crystal X-ray Diffraction measurements:** Large crystals of DPYA (β phase) suitable for single crystal data analysis, were grown from the cooled solutions in CH<sub>3</sub>CN, which were firstly heated at reflux and then cooled to room temperature. The crystal analysis was performed on Rigaku Saturn724 CCD at 173 K using MoK<sub>α</sub> with diffraction radiation (40 kV, 30 mA)

wavelength of 0.71073Å and graphite as monochromator. The crystal structure was solved and refined using Olex2-1.0 with anisotropic displacement parameters for non-H atoms. H atoms were experimentally located through the difference-Fourier electron density maps in all crystal structures. A check of the final crystallographic information file (CIF) with PLATON (Spek, 2009) did not show any missed symmetry. Crystallographic parameters are summarized in Figure S1, CIF files are also deposited with the (CCDC No. 2166838).

**DFT calculation:** The total energies of for the two phases are calculated by the density functional theory (DFT) adopting the PBE functional<sup>2</sup> with the dispersion energy correction given by the DFT-D3 method with Becke-Jonson damping<sup>3</sup>.

**Powder X-ray diffraction (PXRD) measurement:** PXRD measurement was performed on an Empyrean X-ray diffractometer (PANalytic, Netherlands), flat-bed sample holder, where in crystals were grown on slide, next for the few experiments the powder samples are dispersed on glass slide uniformly and then diffraction was carried out with Cu K $\alpha$  radiation. with Cu K $\alpha$  radiation.

**DSC measurement:** Differential scanning calorimetry (DSC) was performed on a TA Discovery DSC 250 calorimeter. Under N<sub>2</sub> gas, samples were examined at a scanning rate of 10 °C/min by applying heating cycle.

#### **Optical Characterization:**

**Solid UV–vis absorption measurement:** The steady absorption spectra of crystals were performed on a Cary 5000 UV-VIS-NIR (Varian, USA) instrument and also an UV-2600 spectrometer (Shimadzu, Japan) using an integrating sphere

**Solid PL measurement:** Photoluminescence (PL) spectra were recorded on a Horiba FluoroMax-4-NIR spectrofluorometer, the excitation wavelength was 375 nm for single crystals. The average PLQY ( $\Phi_{PL}$ ) was measured absolutely according to the five samples by using an integrating sphere on an Edinburgh FLS980 spectrometer. The PL lifetime were detected with a streak camera (C5680, Hamamatsu Photonics), dispersed by a polychromator (250is, Chromex), with a spectral resolution of 1 nm and a time resolution of 10 ps.

**Confocal laser scanning microscopy:** (CLSM) images were recorded on a quartz substrate using an Olympus Research inverted system microscope (FV1000-IX81, Tokyo, Japan) equipped with a charge-coupled device (CCD, Olympus DP71, Tokyo, Japan) camera. The excitation source was a xenon lamp equipped with a band-pass filter (330–380 nm).

**Optical Waveguide:** The  $\mu$ -PL spectra were collected on a home-made optical microscopy system (Supplementary Figure 6). The grown crystals on a quartz coverslip were excited with a UV laser ( $\lambda = 375$  nm, semiconductor laser). PL spectra were coupled into an optical fiber and

collected using a liquid nitrogen-cooled CCD (SPEC-10-400B/LbN, Roper Scientific) attached to a polychromatic (Spectropro-550i, Acton). The excitation laser was filtered with a band pass filter (330–380 nm), then focused to excite the crystals with an objective (50×0.9 NA).

|                                                                                   |                                       |                                 |                                |
|-----------------------------------------------------------------------------------|---------------------------------------|---------------------------------|--------------------------------|
| 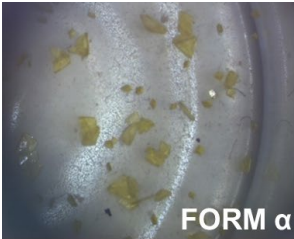 | <b>FORM <math>\alpha</math></b>       | <b>FORM <math>\alpha</math></b> | <b>FORM <math>\beta</math></b> |
|  | <b>FORM <math>\beta</math></b>        |                                 |                                |
|                                                                                   | <b><math>a</math> (Å)</b>             | <b>12.582(10)</b>               | <b>3.7587(8)</b>               |
|                                                                                   | <b><math>b</math> (Å)</b>             | <b>5.997(5)</b>                 | <b>11.009(2)</b>               |
|                                                                                   | <b><math>c</math> (Å)</b>             | <b>10.882(9)</b>                | <b>19.568(4)</b>               |
|                                                                                   | <b><math>\beta</math> (°)</b>         | <b>103.308</b>                  | <b>90.97(3)</b>                |
|                                                                                   | <b><math>V</math> (Å<sup>3</sup>)</b> | <b>799.044</b>                  | <b>809.599</b>                 |
|                                                                                   | <b>Space group</b>                    | <b><math>P2_1/c</math></b>      | <b><math>P2_1/c</math></b>     |
|                                                                                   | <b>CCDC No.</b>                       | <b>1439496</b>                  | <b>2166838</b>                 |

**Figure S1.** Two phases of bulk single crystals grown in acetonitrile solution along with the crystallographic parameters.

**Table S1.** Crystal structure parameters of the Form  $\beta$ .

| Parameters                              | Form $\beta$                                   |
|-----------------------------------------|------------------------------------------------|
| Empirical Formula                       | C <sub>24</sub> H <sub>16</sub> N <sub>2</sub> |
| Formula weight                          | 332.39                                         |
| Crystal system                          | Monoclinic                                     |
| Space group                             | $P2_1/n$                                       |
| T (K)                                   | 173                                            |
| $a$ (Å)                                 | 3.7587(8)                                      |
| $b$ (Å)                                 | 11.009(2)                                      |
| $c$ (Å)                                 | 19.568(4)                                      |
| $\alpha$ (°)                            | 90                                             |
| $\beta$ (°)                             | 90.97                                          |
| $\gamma$ (°)                            | 90                                             |
| $V$ (Å <sup>3</sup> )                   | 809.6(3)                                       |
| $D_{\text{calcd}}$ (gcm <sup>-3</sup> ) | 1.363                                          |

|                             |        |
|-----------------------------|--------|
| Z                           | 2      |
| $R_1[I > 2\sigma(I)]$       | 0.0507 |
| $wR_2$ (all)                | 0.1310 |
| Goodness-of-fit             | 1.110  |
| No. of reflections used     | 1796   |
| Total number of reflections | 1836   |
| X-Ray Diffract meter        | Rigaku |

---

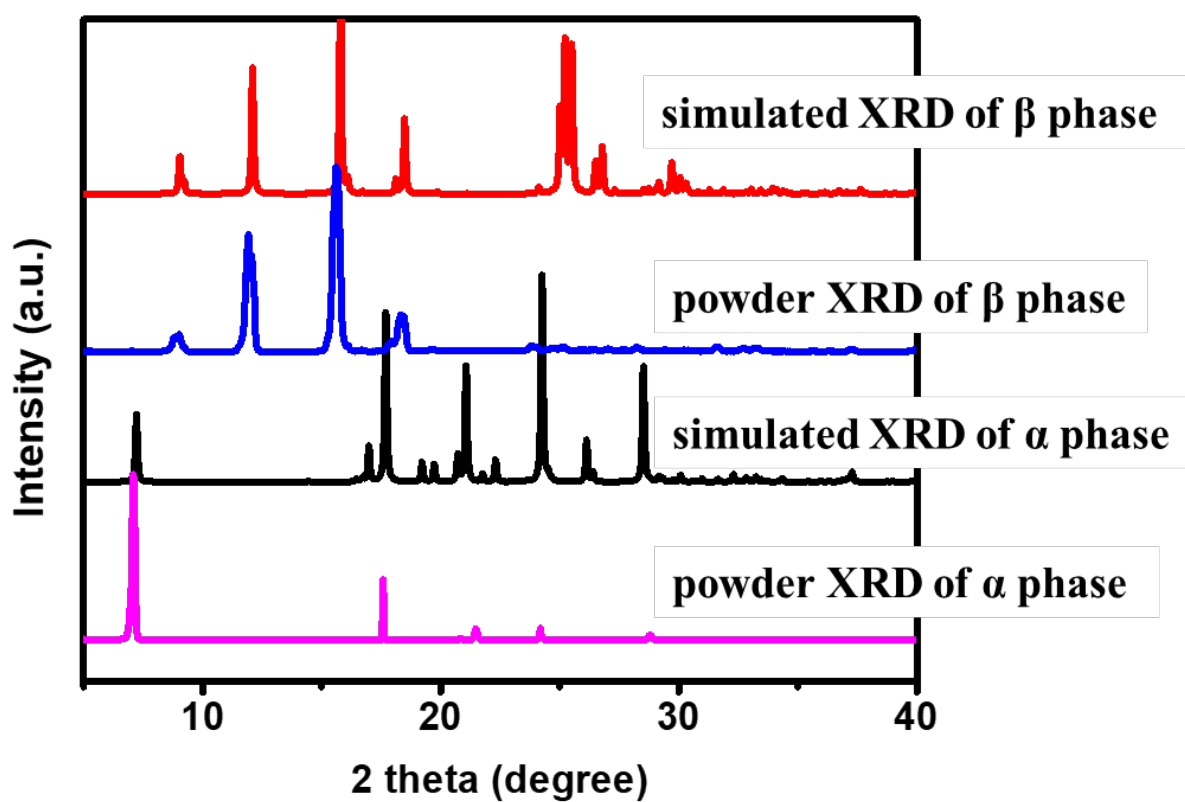

**Figure S2.** XRD patterns of the two phases of crystals on the quartz substrate compared with the simulated XRD pattern.

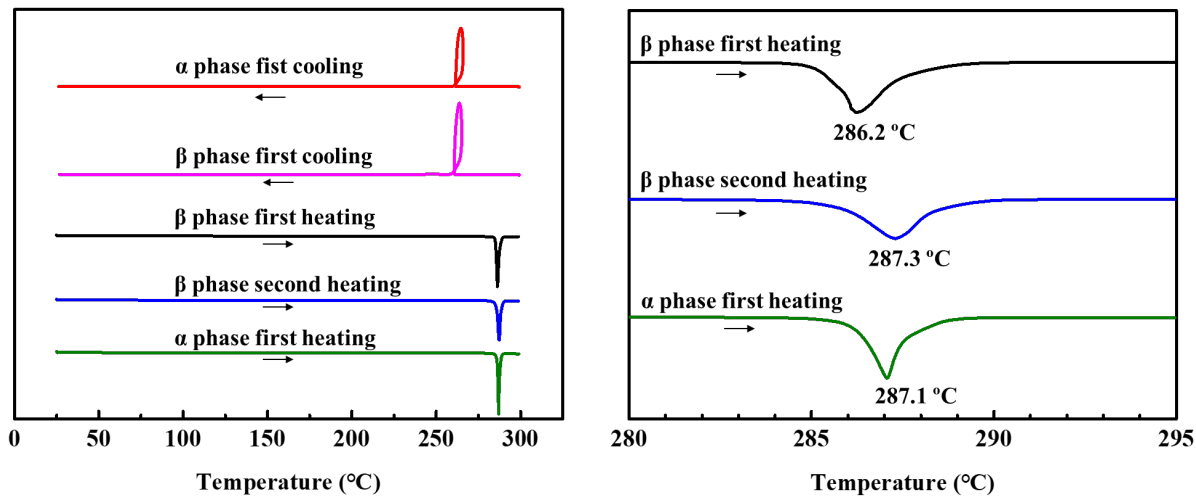

**Figure S3.** DSC curves of two phases of DPYA. There is a small difference of melting point for the  $\alpha$  phase and  $\beta$  phase as shown in the right figure.

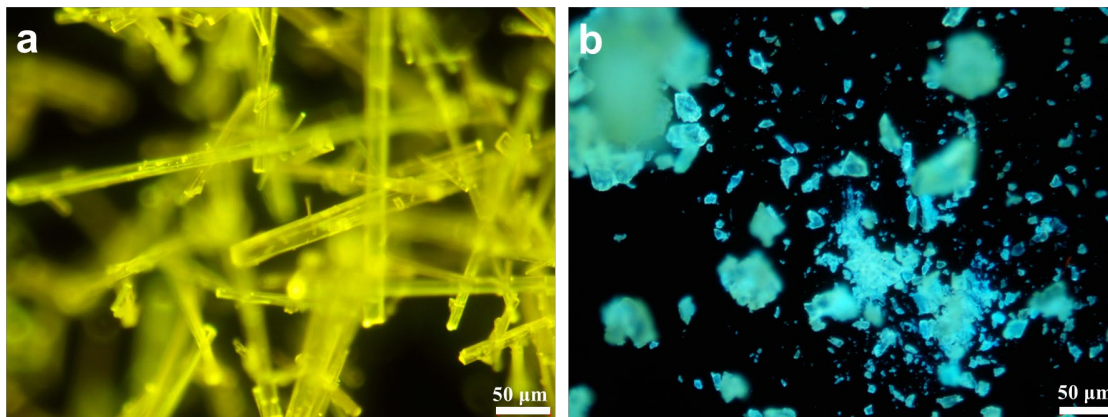

**Figure S4.** CLSM images of  $\beta$  phase crystals before (a) and after (b) DSC measurement

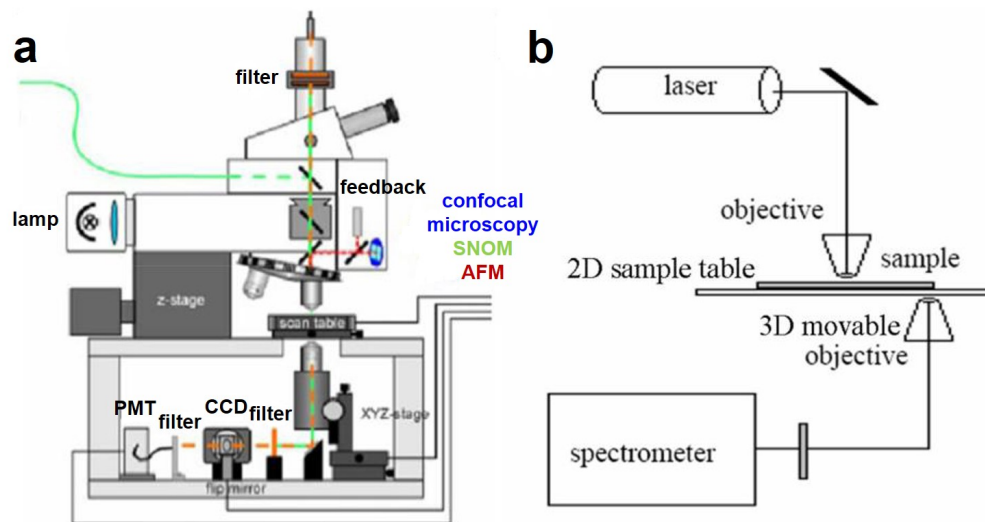

**Figure S5.** Schematic illustration of home-built confocal  $\mu$ -luminescence system. (a) The near-field scanning optical microscopy. (b) The transmittance optical path for the waveguide measurements.

#### Reference

- 1 J. Liu, W. Zhu, K. Zhou, Z. Wang, Y. Zou, Q. Meng, J. Li, Y. Zhen and W. Hu, *J. Mater. Chem. C*, 2016, **4**, 3621.
- 2 J. P. Perdew, K. Burke and M. Ernzerhof, *Phys. Rev. Lett.*, 1996, **77**, 3865.
- 3 S. Grimme, S. Ehrlich and L. Goerigk, *J. Comput. Chem.*, 2011, **32**, 1456.
